# Supplementary material for: The hydrogen-bond configuration modulates the energy transfer efficiency in helical protein nanotubes
Source: Royal Society of Chemistry journal article supplement (doi:10.1039/d0nr06031c), 2020-11-30
Supplement: d0nr06031c1.pdf [file d0nr06031c1.pdf]

**Supplementary Information for**

**Hydrogen-Bond Configuration Modulates Energy Transfer Efficiency in  
Helical Protein Nanotubes**

*Jinlong He,<sup>ab</sup> Lin Zhang,<sup>cd</sup> and Ling Liu<sup>\*a</sup>*

*<sup>a</sup>Department of Mechanical Engineering, Temple University, Philadelphia, PA 19122, United  
States*

*<sup>b</sup>Department of Mechanical and Aerospace Engineering, Utah State University, Logan, Utah  
84322, United States*

*<sup>c</sup>Department of Engineering Mechanics, School of Civil Engineering, Shandong University,  
Jinan, 250061, P.R. China*

*<sup>d</sup>Department of Mechanical Engineering and Materials Science, University of Pittsburgh,  
Pittsburgh, PA 15261, United States*

\*Corresponding author: Tel: 215-204-8616. Fax: 215-204-4956;

\*Email: [ling.liu@temple.edu](mailto:ling.liu@temple.edu)

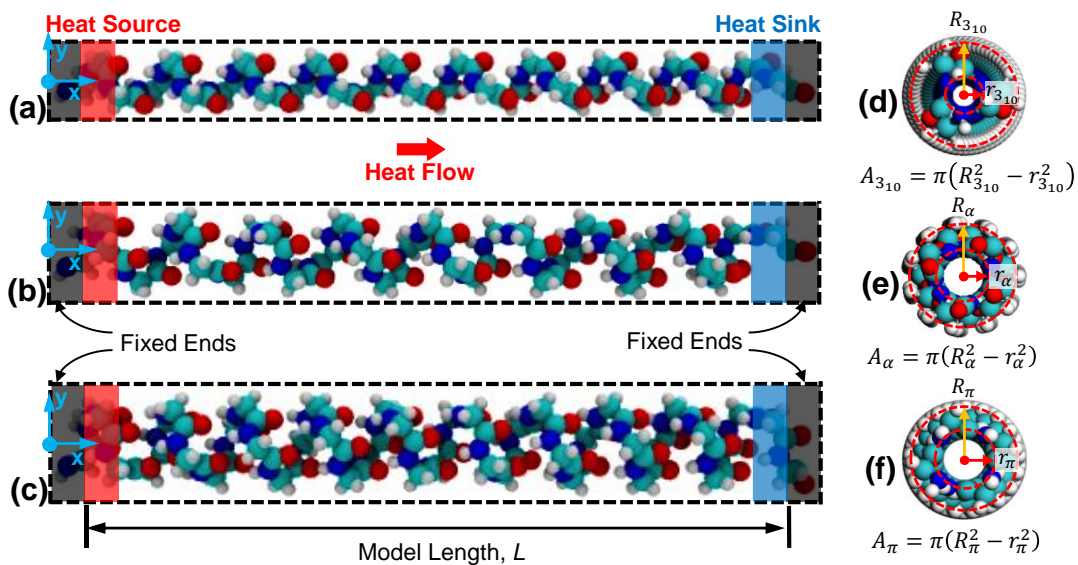

**Fig. S1.** Setup of the NEMD simulation for predicting thermal conductivities of the a)  $3_{10}$ -, b)  $\alpha$ -, and c)  $\pi$ -helices. Heat flow is generated by adding energy into the heat source (red region) and removing the same amount of energy from the heat sink (blue region).  $L$  is the characteristic length. The simulation cell is divided into  $N$  slabs. The two end slabs are fixed for heat insulation. Periodic boundary conditions are applied along all three directions. Cross-sectional view of the d)  $3_{10}$ -, e)  $\alpha$ -, and f)  $\pi$ -helix models. The cross-sectional area is calculated using averaged inner and outer radii of the helices.

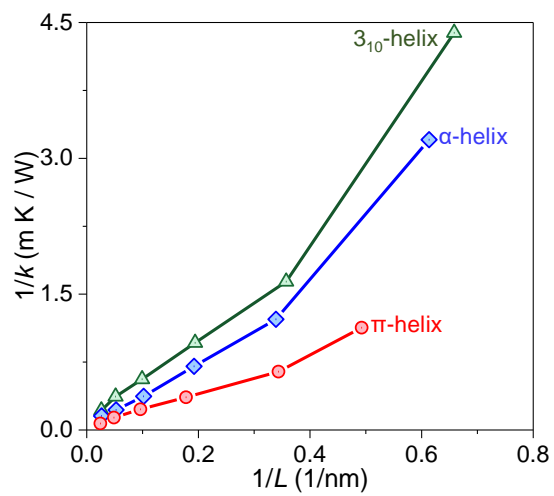

**Fig. S2.** Inverse of thermal conductivity versus inverse of length for the isomer helices.

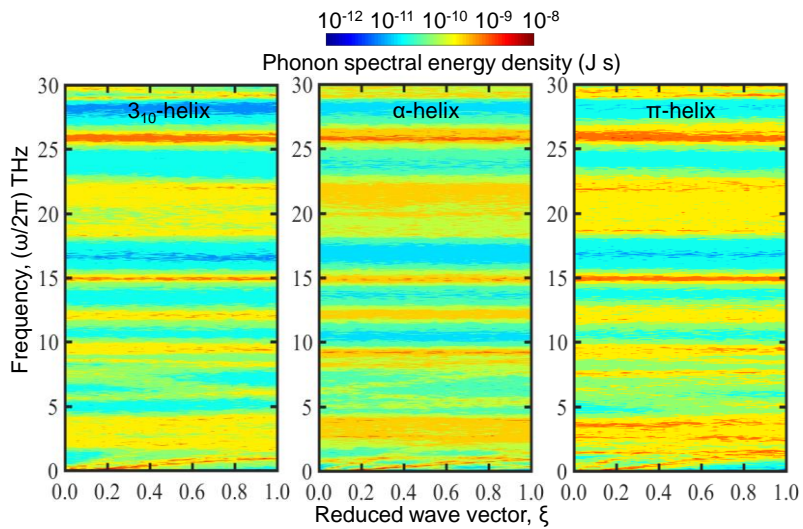

**Fig. S3.** Phonon spectral energy density for the three isomer helices at  $T = 298$  K. Shading on these plots represents the magnitude of phonon spectral energy density for different phonon mode combining specific  $\kappa$  and  $\omega$ .

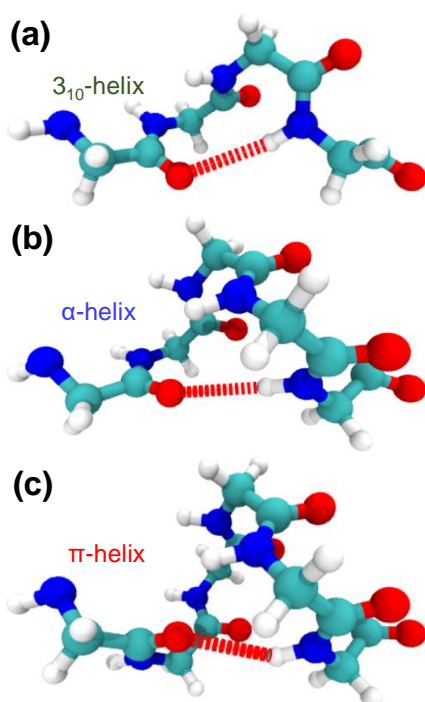

**Fig. S4.** Intercepted helices for DFT-based quantum-chemical analysis of H-bond: a) the  $3_{10}$ -helix segment has four residues; b) the  $\alpha$ -helix segment has five residues; and c) the  $\pi$ -helix segment has six residues.
